# Supplementary material for: Diet Control to Achieve Euglycemia Induces Tau Hyperphosphorylation Via AMPK Activation in the Hippocampus of Diabetic Rats
Source: Preprints.org preprint supplement (doi:10.20944/preprints201808.0448.v2), 2018-10-08
Supplement: Supplementary file 1 [file Table S1.docx]

| **Table 1. Antibodies used** | | | | |
| --- | --- | --- | --- | --- |
| Antibody | Host | Species Cross-Reactivity | Catalog No | Source |
| AMPK | Rabbit | Human, Mouse, Rat, Monkey, Hamster | 2532 | CST |
| Phospho-AMPK | Rabbit | Human, Mouse, Rat, D. melanogaster, S. cerevisiae; phospho-Thr172 | 4188 | CST |
| Akt | Rabbit | Human, Mouse, Rat, Monkey, D. melanogaster | 4691 | CST |
| Phospho-Akt | Rabbit | Human, Mouse, Rat, Monkey, Hamster, Bovine, D. melanogaster, Zebrafish | 4060 | CST |
| GSK-3β | Rabbit | Human, Mouse, Rat, Hamster | 5558 | CST |
| Phospho-GSK-3β | Rabbit | Human, Mouse, Rat, Monkey; pSer9 | 12456 | CST |
| PP2A | Rabbit | Human, Mouse, Rat, Bovine, Chicken | 07-1216 | Millipore |
| Phospho-PP2A | Rabbit | Human, Mouse, Rat, Bovine, Chicken | 05-547 | Millipore |
| Tau | Rabbit | Human, Mouse | PA5-27287 | Invitrogen |
| Phospho-tau | Rabbit | Human, Mouse, Rat; pSer199/202 | 44-768G | Invitrogen |
| Phospho-tau | Rabbit | Human, Rat; pSer396 | 710298 | Invitrogen |
| Beta-actin | Rabbit | Human, Mouse, Rat, Monkey, Mink, Hamster, Bovine, D. melanogaster, Zebrafish, Dog | 4967 | CST |
| 2nd Antibody | Goat | Rabbit, HRP-conjugated | 7074 | CST |

CST, Cell Signaling Technology
