# Supplementary figures and images for: Diet Control to Achieve Euglycemia Induces Tau Hyperphosphorylation Via AMPK Activation in the Hippocampus of Diabetic Rats
Source: Preprints.org preprint supplement (doi:10.20944/preprints201808.0448.v2), 2018-10-08

**Figure S1**

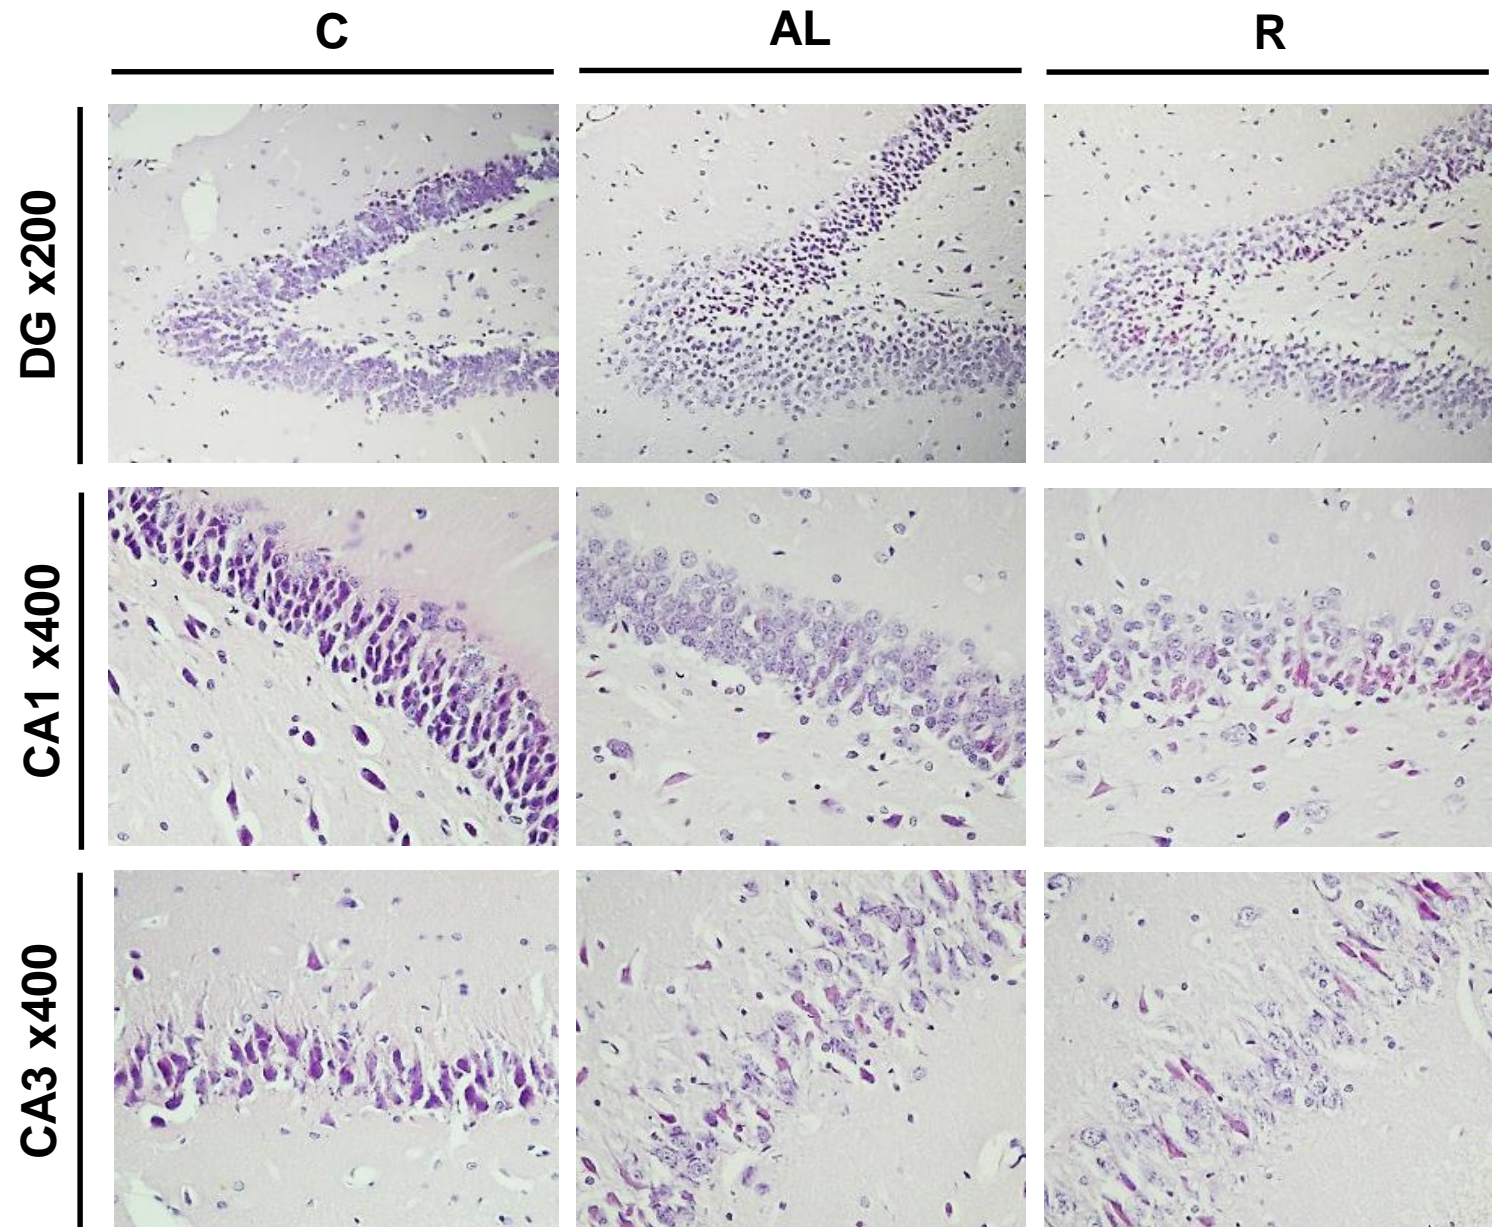

Supplement: Supplementary file 1 [file supplementary]
